# Supplementary material
Source: PubMed Central journal article supplement (PMC3331890)
Supplement: NIHMS359551-supplement-1.pdf [file NIHMS359551-supplement-1.pdf]

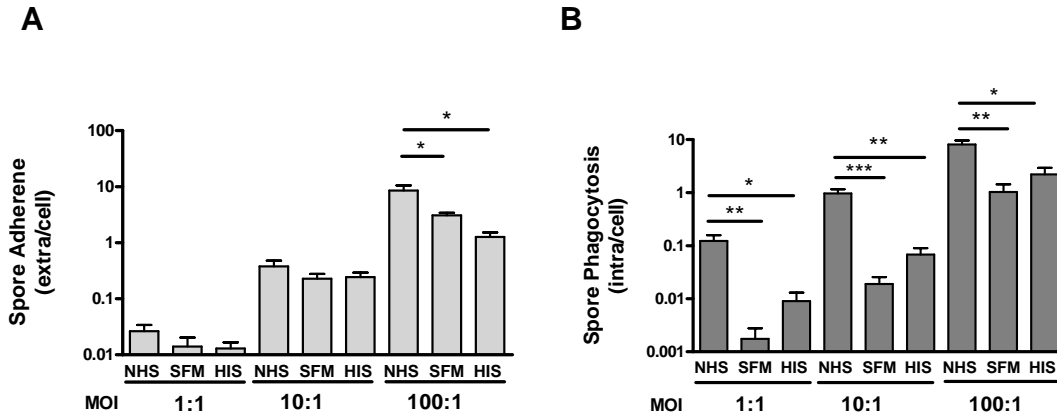

**Supplemental figure S1. Phagocytosis of *B. anthracis* spores by macrophages with different MOI.** RAW264.7 cells were incubated with 7702 spores at different MOI for 30min and detection of extracellular and intracellular spores were as described in the legend for Figure 1. **A**, the number of extracellular adhered spores per macrophage. **B**, the number of intracellular spores per macrophage. The results were combined from at least three independent experiments. Approximately 1000 macrophages were analyzed for each condition in each independent experiment. \*,  $p < 0.05$ ; \*\*,  $p < 0.01$ ; \*\*\*,  $p < 0.001$ ; student's  $t$  test.

Fig. S1

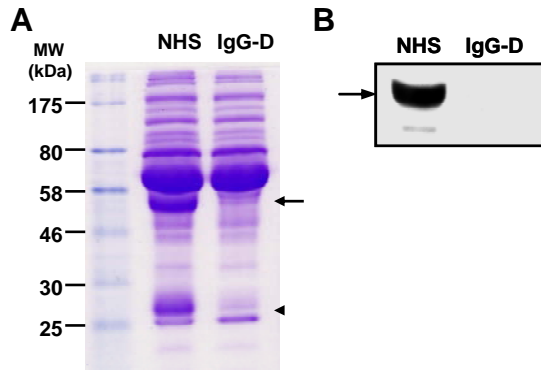

**Supplemental figure S2. Depletion of IgG from normal human serum.** IgG was depleted by passing the serum through a protein G column as described in the Materials and Methods section. The depletion was confirmed by SDS-PAGE (A) and western blot (B). The heavy chain and the light chain of IgG were indicated by an arrow and an arrowhead, respectively.

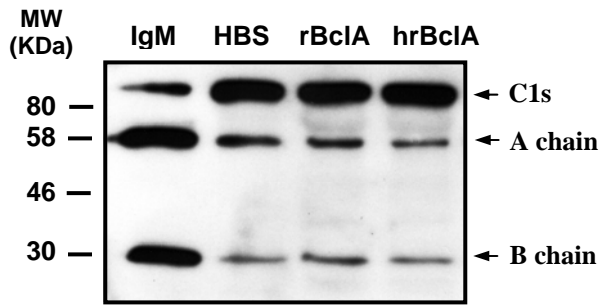

**Supplemental figure S3. recombinant BclA (rBclA) does not activate C1.** Purified C1 was incubated with rBclA (26  $\mu$ M), heated treated rBclA (hrBclA 26  $\mu$ M), IgM (10  $\mu$ g/ml) or HBS buffer only and samples were analyzed by western blot using anti-C1s antibody and a second antibody. Full-length C1s and cleavage products A chain and B chain were indicated by arrows.

Fig. S3
